# Supplementary material for: Frontiers in Operations: Operational Overload: The Impact of Workload on High-Skilled Workforce Attrition
Source: Atypon-hosted journal article supplement (doi:10.1287/msom.2025.0037), 2026-02-18
Supplement: msom.2025.0037.sm2.pdf [file msom.2025.0037.sm2.pdf]

## Online Appendix

# Operational Overload: The Impact of Workload on High-Skilled Workforce Attrition

Blair (Lianlian) Liu

Kenan-Flagler Business School, University of North Carolina at Chapel Hill, Chapel Hill, North Carolina 27599,  
blairliu@email.unc.edu

Diwas KC

Goizueta Business School, Emory University, Atlanta, Georgia 30322, diwas.kc@emory.edu

Bradley R. Staats

Kenan-Flagler Business School, University of North Carolina at Chapel Hill, Chapel Hill, North Carolina 27599,  
bstaats@unc.edu

Michael Fundora

School of Medicine, Emory University, Atlanta, Georgia 30322, michael.fundora@emory.edu

### 1. Summary Statistics

Following the discussion of Section 4.2.3, we also provide the summary statistics for all 420 nurses who worked during the observation period in Table A1.

**Table A1: Summary statistics**

|                                   | N     | Mean     | SD       |
|-----------------------------------|-------|----------|----------|
| <b>Main Variables</b>             |       |          |          |
| Quit                              | 59859 | 0.017    | 0.128    |
| Nurse Responsibility              | 59859 | 0.027    | 0.038    |
| Overtime Shifts                   | 59859 | 0.357    | 0.657    |
| Emotional Fatigue                 | 59859 | 0.079    | 0.288    |
| Cumulative Workload               | 59859 | 4427.777 | 2387.401 |
| <b>Control Variables</b>          |       |          |          |
| Patient Nurse Ratio               | 59859 | 0.660    | 0.069    |
| Bed Occupancy Rate                | 59859 | 0.741    | 0.115    |
| Unit Experience                   | 59859 | 163.416  | 129.600  |
| Shift Workload                    | 59859 | 337.404  | 365.401  |
| <b>Robustness Check Variables</b> |       |          |          |
| Emotional Fatigue 4 weeks         | 59859 | 0.147    | 0.398    |
| Avg Shifts Stayed                 | 59859 | 63.588   | 77.603   |
| Num New Admit                     | 59859 | 0.044    | 0.204    |
| Total Shifts Prior Month          | 59859 | 15.970   | 7.244    |
| Avg Workload Prior Month          | 59859 | 343.772  | 133.93   |
| <b>Instrument Variables</b>       |       |          |          |
| Lagged Arrival Rate               | 59859 | 1.224    | 1.328    |
| Peer Scheduled Absences           | 59859 | 0.347    | 0.665    |
| Peer Unscheduled Absences         | 59859 | 44.001   | 21.801   |

### 2. VIF Collinearity Diagnostics

After obtaining the main result in Section 5.1 Table 2, we conduct a variance inflation factor (VIF) check for variables in our main specification. Multicollinearity can inflate standard errors and distort coefficient estimates, potentially leading to unreliable regression results. By performing this VIF analysis, we ensure that our independent variables do not exhibit high multicollinearity. Based on commonly accepted

thresholds (i.e., VIF values greater than 5 or 10), our results confirm that multicollinearity is not a significant concern in our result.

**Table A2. Robustness Check (2)  
VIF Collinearity Diagnostics (1)**

| Variable             | VIF   | SQRT VIF | Tolerance | R-Squared |
|----------------------|-------|----------|-----------|-----------|
| Nurse_Responsibility | 1.050 | 1.020    | 0.956     | 0.044     |
| Overtime_Shifts      | 1.080 | 1.040    | 0.925     | 0.075     |
| Emotional_Fatigue    | 1.000 | 1.000    | 0.996     | 0.004     |
| Cumulative_Workload  | 1.130 | 1.060    | 0.887     | 0.113     |
| Mean VIF             | 1.060 |          |           |           |

**VIF Collinearity Diagnostics (2)**

| Variable             | VIF   | SQRT VIF | Tolerance | R- Squared |
|----------------------|-------|----------|-----------|------------|
| Nurse_Responsibility | 3.920 | 1.980    | 0.255     | 0.745      |
| Overtime_Shifts      | 1.060 | 1.030    | 0.941     | 0.059      |
| Emotional_Fatigue    | 1.020 | 1.010    | 0.977     | 0.023      |
| Cumulative_Workload  | 1.080 | 1.040    | 0.929     | 0.071      |
| Patient_Nurse_Ratio  | 1.140 | 1.070    | 0.878     | 0.122      |
| Bed_Occupancy_Rate   | 1.270 | 1.130    | 0.787     | 0.213      |
| Unit_Experience      | 1.130 | 1.060    | 0.885     | 0.115      |
| Shift_Workload       | 3.770 | 1.940    | 0.265     | 0.735      |
| Mean VIF             | 1.800 |          |           |            |

### 6.1 Robustness Check on Alternative outcome variable $Y_{jt}$

**Table A3. Robustness Check (6.1)**

|                                                                                              | Quit 4-7 Weeks            | Quit 4-8 Weeks             | Quit 4-9 Weeks             |
|----------------------------------------------------------------------------------------------|---------------------------|----------------------------|----------------------------|
| Nurse_Responsibility                                                                         | -8.005**<br>(3.139)       | -7.945**<br>(2.832)        | -5.749**<br>(2.544)        |
| Overtime_Shifts                                                                              | 0.556**<br>(0.085)        | 0.461**<br>(0.077)         | 0.325**<br>(0.073)         |
| Emotional_Fatigue                                                                            | 0.444**<br>(0.190)        | 0.434**<br>(0.165)         | 0.585**<br>(0.149)         |
| Cumulative_Workload                                                                          | -0.000382**<br>(0.000100) | -0.000451**<br>(0.0000904) | -0.000402**<br>(0.0000852) |
| Cumulative_Workload_Square                                                                   | 3.72e-08**<br>(1.02e-08)  | 3.86e-08**<br>(9.38e-09)   | 2.89e-08**<br>(8.99e-09)   |
| RN Fix Effect: (Nurse ID)                                                                    | Yes                       | Yes                        | Yes                        |
| Time Control: (Year, Month)                                                                  | Yes                       | Yes                        | Yes                        |
| Shift Control: (Patient Nurse Ratio, Bed Occupancy Rate, RN Unit Experience, Shift Workload) | Yes                       | Yes                        | Yes                        |
| Number of Observations                                                                       | 17599                     | 17606                      | 18033                      |
| LR Chi2                                                                                      | 2431.0                    | 3023.2                     | 3638.5                     |

Standard errors in parentheses

\*  $p < 0.10$ , \*\*  $p < 0.05$ , \*\*\*  $p < 0.01$

## 6.2 Further Analysis on H1 Nurse\_Responsibility<sub>jt</sub>

There are alternative explanations for the findings of H1 nurse responsibility: a nurse with higher responsibility may care for patients who have been in the ICU for a longer period. Or alternatively, a nurse with lower responsibility may care for newly admitted patients with intense and acute needs. To address this concern, we constructed corresponding variables, then tested the correlations of these variables with H1 nurse responsibility, and eventually incorporated the new variables as control variables in the robustness check.

Firstly, we constructed two additional variables. *Avg\_Shifts\_Stayed<sub>jt</sub>*: The average shifts those patients have stayed in the ICU until shift t and under care by nurse j at shift t. *Num\_New\_Admit<sub>jt</sub>*: The number of newly admitted patients, under care by nurse j at shift t.

Secondly, we verify the correlation of these variables with H1.  $\text{Corr}(\text{Nurse\_Responsibility}_{jt}, \text{Num\_New\_Admit}_{jt}) = 0.144$ ,  $\text{Corr}(\text{Nurse\_Responsibility}_{jt}, \text{Avg\_Shifts\_Stayed}_{jt}) = -0.015$ . These findings suggest that nurses with higher responsibility are slightly more likely to care for newly admitted patients, either those in their first ICU shift or the early stages of their ICU stay. This pattern contradicts the concern that higher-responsibility nurses are shielded from intensive or acute care activities. Instead, correlations show that when a nurse takes on a greater share of patient responsibility in a shift, they may be more involved in managing newly admitted patients and the complexity that comes with early ICU care.

Thirdly, we run the two regressions<sup>1</sup> as robustness checks. In the first regression, we add *Avg\_Shifts\_Stayed<sub>jt</sub>* as an additional control. In the second regression, we add *Num\_New\_Admit<sub>jt</sub>* as an additional control. These two regressions address the potential endogeneity concerns from newly admitted patients' care demand and early ICU stay patients' care demand towards H1 *Nurse\_Responsibility<sub>jt</sub>*. The regression results remain consistent after we control for the additional variables.

**Table A4. Robustness Check (6.2)**

|                            | (1)                         | (2)                         |
|----------------------------|-----------------------------|-----------------------------|
| Nurse_Responsibility       | -7.961***<br>(2.834)        | -7.885***<br>(2.873)        |
| Overtime_Shifts            | 0.461***<br>(0.0771)        | 0.461***<br>(0.0771)        |
| Emotional_Fatigue          | 0.434***<br>(0.165)         | 0.434***<br>(0.165)         |
| Cumulative_Workload        | -0.000450***<br>(0.0000905) | -0.000451***<br>(0.0000905) |
| Cumulative_Workload_Square | 3.85e-08***<br>(9.40e-09)   | 3.86e-08***<br>(9.38e-09)   |
| Avg_Shifts_Stayed          | -0.000226<br>(0.000567)     |                             |

<sup>1</sup> Since *Avg\_Shifts\_Stayed<sub>jt</sub>* and *Nun\_New\_Admit<sub>jt</sub>* are similar proxies for how intense a nurse's shift is, we separately incorporate them in the two regressions.

|                                                                                               |        |                    |
|-----------------------------------------------------------------------------------------------|--------|--------------------|
| Num_New_Admit                                                                                 |        | -0.0248<br>(0.203) |
| Fix Effect RN: Nurse ID                                                                       | Yes    | Yes                |
| Fix Effect Time: Year, Month                                                                  | Yes    | Yes                |
| Fix Effect Shift: Patient Nurse Ratio, Bed Occupancy Rate, RN Unit Experience, Shift Workload | Yes    | Yes                |
| Number of Observations                                                                        | 17606  | 17606              |
| chi2                                                                                          | 3023.3 | 3023.2             |

Standard errors in parentheses  
\*  $p < 0.10$ , \*\*  $p < 0.05$ , \*\*\*  $p < 0.01$

### 6.3 Robustness Check on H4, emotional fatigue

**Table A5. Robustness Check (6.3)**  
**Alternative window period of the Emotional Fatigue variable**

|                                                                                               | Xtlogit                     |
|-----------------------------------------------------------------------------------------------|-----------------------------|
| Nurse_Responsibility                                                                          | -8.087***<br>(2.837)        |
| Overtime_Shifts                                                                               | 0.459***<br>(0.077)         |
| Emotional_Fatigue_4_weeks                                                                     | 0.317**<br>(0.154)          |
| Cumulative_Workload                                                                           | -0.000448***<br>(0.0000903) |
| Cumulative_Workload_Square                                                                    | 3.90e-08***<br>(9.36e-09)   |
| Fix Effect RN: Nurse ID                                                                       | Yes                         |
| Fix Effect Time: Year, Month                                                                  | Yes                         |
| Fix Effect Shift: Patient Nurse Ratio, Bed Occupancy Rate, RN Unit Experience, Shift Workload | Yes                         |
| Number of Observations                                                                        | 17606                       |
| chi2                                                                                          | 3020.6                      |

Standard errors in parentheses  
\*  $p < 0.10$ , \*\*  $p < 0.05$ , \*\*\*  $p < 0.01$

### 6.4 Robustness Check on H4, Cumulative Workload

#### 6.4.1 Cumulative Workload with decay rate 0.05

**Table A6. Robustness Check (6.4.1)**  
**Alternative decay parameter of the Cumulative\_Workload variable**

|                      | Xtlogit              |
|----------------------|----------------------|
| Nurse_Responsibility | -7.978***<br>(2.828) |

|                                                                                                    |                              |
|----------------------------------------------------------------------------------------------------|------------------------------|
| Overtime_Shifts                                                                                    | 0.439***<br>(0.077)          |
| Emotional_Fatigue                                                                                  | 0.396**<br>(0.164)           |
| Cumulative_Workload_New                                                                            | -0.000573***<br>(0.000164)   |
| Cumulative_Workload_New_Square                                                                     | 0.000000120***<br>(3.58e-08) |
| RN Fix Effect: (Nurse ID)                                                                          | Yes                          |
| Time Control: (Year, Month)                                                                        | Yes                          |
| Shift Control: (Patient Nurse Ratio,<br>Bed Occupancy Rate, RN Unit<br>Experience, Shift Workload) | Yes                          |
| Number of Observations                                                                             | 17606                        |
| LR Chi2                                                                                            | 3008.9                       |

Standard errors in parentheses  
\*  $p < 0.10$ , \*\*  $p < 0.05$ , \*\*\*  $p < 0.01$

## 6.4.2 Cumulative Workload by care activity types

If zooming into nurses' patient flowsheet documentation, there are two types of care activities: routine and acute. The difference between routine and acute care activities is determined by two separate tabs in the patient flowsheet documentation, which enable us to accurately distinguish workload types.

Routine care activities include standard tasks that nurses are required to perform for all ICU patients throughout each shift. Examples include regular patient assessment, documentation of vital signs, and basic patient care. Acute care activities represent tasks involving higher physical workload and greater emotional intensity, typically required only by critically ill patients. These activities encompass complex procedures and intensive interventions such as managing renal replacement therapy (CVVH and Dialysis), administering transfusions, and operating advanced life-support equipment (e.g., ECMO). Since not all patients require the acute care activities, many nurses may not perform the acute workload during their shifts.

We recalculated the cumulative routine workload and the cumulative acute workload, utilizing hypothesis 4's cumulative workload's embedded exponential decay function.

$$Cumulative\_Routine\_Workload_{jt} = \sum_{t'=t-56}^{t'=t-1} Routine\_Workload_{jt} * e^{-\lambda*(t-t')}$$

$$Cumulative\_Acute\_Workload_{jt} = \sum_{t'=t-56}^{t'=t-1} Acute\_Workload_{jt} * e^{-\lambda*(t-t')}$$

To replace Hypothesis 4, we used the cumulative routine workload, cumulative acute workload, and their quadratic terms in the following table as a robustness check. In Table 7, we observe a U-shaped relationship between the nurse's routine care activities and voluntary attrition, which is consistent with Hypothesis 4. While moderate levels of routine care may be engaging and stabilizing, excessive routine burden leads to burnout. In contrast, acute workload exhibits a weak inverted U-shaped pattern ( $p < 0.1$ ), suggesting that some exposure to high-severity care may increase the risk of attrition, but those consistently handling

complex cases may be more resilient, thereby reducing the risk of attrition. The remaining results on Hypotheses 1-3 remain consistent and statistically significant.

Relevant managerial implications: Based on the U-shaped finding on routine care, managers should evenly distribute routine care to nurses and monitor their workload across shifts to prevent disengagement from underload and burnout from overload. Based on the inverted U-shaped finding on acuity care, managers should be careful in identifying nurses with moderate exposure to acute tasks across shifts, who may be at greatest risk of stress. These findings highlight the importance of balancing the immediate staffing needs within shift, with the long-term goal of nurse retention across shifts. In particular, there's value in tracking both routine and acute workloads longitudinally to inform daily shift assignment and avoid chronic workload imbalance.

**Table A7. Robustness Check (6.4.2)  
Cumulative Workload by Care Activity Types**

|                                                                                                     | Xtlogit                        |
|-----------------------------------------------------------------------------------------------------|--------------------------------|
| Nurse_Responsibility                                                                                | -7.676***<br>(2.836)           |
| Overtime_Shifts                                                                                     | 0.483***<br>(0.0787)           |
| Emotional_Fatigue                                                                                   | 0.408**<br>(0.166)             |
| Cumulative_Routine_Workload                                                                         | -0.000462***<br>(0.0000951)    |
| Cumulative_Routine_Workload_Square                                                                  | 4.72e-08***<br>(1.02e-08)      |
| Cumulative_Acute_Workload                                                                           | -0.000698<br>(0.000481)        |
| Cumulative_Acute_Workload_Square                                                                    | -0.000000591*<br>(0.000000312) |
| Fix Effect RN: Nurse ID                                                                             | Yes                            |
| Fix Effect Time: Year, Month                                                                        | Yes                            |
| Fix Effect Shift: Patient Nurse Ratio,<br>Bed Occupancy Rate, RN Unit<br>Experience, Shift Workload | Yes                            |
| Number of Observations                                                                              | 17606                          |
| chi2                                                                                                | 3064.0                         |

Standard errors in parentheses  
\*  $p < 0.10$ , \*\*  $p < 0.05$ , \*\*\*  $p < 0.01$

### 6.4.3 Trim at the 5<sup>th</sup> percentile of $Cumulative\_Workload_{jt}$

To address whether nurses with very few care activities intentionally used paid leave before resigning, potentially contributing to the U-shaped relationship, we trimmed the cumulative workload variable at the 5<sup>th</sup> percentile and re-ran the regression. The results confirm that the U-shaped relationship for cumulative workload remains consistent, and the coefficients for Hypotheses 1-3 remain stable.

**Table A8. Robustness Check (6.4.3)**  
**Trim Cumulative Workload at 5<sup>th</sup> Percentile**

|                                                                                               | Xtlogit                     |
|-----------------------------------------------------------------------------------------------|-----------------------------|
| Nurse_Responsibility                                                                          | -7.601***<br>(2.876)        |
| Overtime_Shifts                                                                               | 0.477***<br>(0.0773)        |
| Emotional_Fatigue                                                                             | 0.463***<br>(0.166)         |
| Cumulative_Workload                                                                           | -0.000567***<br>(0.0000969) |
| Cumulative_Workload_Square                                                                    | 4.86e-08***<br>(9.81e-09)   |
| Fix Effect RN: Nurse ID                                                                       | Yes                         |
| Fix Effect Time: Year, Month                                                                  | Yes                         |
| Fix Effect Shift: Patient Nurse Ratio, Bed Occupancy Rate, RN Unit Experience, Shift Workload | Yes                         |
| Number of Observations                                                                        | 16869                       |
| chi2                                                                                          | 2985.0                      |

Standard errors in parentheses  
\*  $p < 0.10$ , \*\*  $p < 0.05$ , \*\*\*  $p < 0.01$

#### 6.4.4 Cumulative Workload with external and internal factors

This robustness check focuses on the H4, Cumulative Workload in the past month. A nurse’s total amount of workload in the past month may be influenced by external factors (e.g., manager assignment or patient conditions) or internal factors (such as the nurse's own decisions to work or take days off).

To gain a deeper understanding, we introduced two additional variables: the total number of shifts worked in the past four weeks (*Total\_Shifts\_Last\_Month<sub>jt</sub>*), and the average number of care activities per shift in the past four weeks (*Avg\_Workload\_Last\_Month<sub>jt</sub>*). The first variable captures shift frequency (more of a nurse’s own decision), the second variable captures shift intensity (more of manager assignment or patient condition).

Since *Total\_Shifts\_Last\_Month<sub>jt</sub>* and *Avg\_Workload\_Last\_Month<sub>jt</sub>* are moderately correlated (corr = 0.3285,  $p < 0.001$ ), we addressed potential multicollinearity by presenting three model specifications. Column (1) includes both variables simultaneously. Column (2) includes only *Avg\_Workload\_Last\_Month<sub>jt</sub>*, Column (3) includes only *Total\_Shifts\_Last\_Month<sub>jt</sub>*.

Table A9’s results are informative. Column (1) suggests that both higher shift intensity and higher shift frequency are associated with increased attrition risk. Column (2) shows that shift intensity, with external factors such as patient acuity and manager assignment, contributes to attrition risk. In contrast, Column (3) finds that the shift frequency, a proxy for time off or rest, is not significantly associated with attrition risk.

**Table A9. Robustness Check (6.4.4)**

|                                                                                                        | (1)                        | (2)                         | (3)                        |
|--------------------------------------------------------------------------------------------------------|----------------------------|-----------------------------|----------------------------|
| Nurse_Responsibility                                                                                   | -7.407***<br>(2.836)       | -7.808***<br>(2.837)        | -7.784***<br>(2.830)       |
| Overtime_Shifts                                                                                        | 0.483***<br>(0.0776)       | 0.469***<br>(0.0773)        | 0.465***<br>(0.0771)       |
| Emotional_Fatigue                                                                                      | 0.433***<br>(0.167)        | 0.475***<br>(0.167)         | 0.398**<br>(0.167)         |
| Cumulative_Workload                                                                                    | -0.000796***<br>(0.000137) | -0.000525***<br>(0.0000976) | -0.000559***<br>(0.000114) |
| Cumulative_Workload_Square                                                                             | 5.01e-08***<br>(9.99e-09)  | 4.40e-08***<br>(9.74e-09)   | 3.98e-08***<br>(9.43e-09)  |
| Avg_Workload_Prior_Month                                                                               | 0.00155***<br>(0.000503)   | 0.000897**<br>(0.000447)    |                            |
| Total_Shifts_Prior_Month                                                                               | 0.0698***<br>(0.0249)      |                             | 0.0348<br>(0.0221)         |
| Fix Effect RN: Nurse ID                                                                                | Yes                        | Yes                         | Yes                        |
| Fix Effect Time: Year, Month                                                                           | Yes                        | Yes                         | Yes                        |
| Fix Effect Shift: Patient Nurse<br>Ratio, Bed Occupancy Rate, RN<br>Unit Experience, Shift<br>Workload | Yes                        | Yes                         | Yes                        |
| Number of Observations                                                                                 | 17606                      | 17606                       | 17606                      |
| chi2                                                                                                   | 3035.0                     | 3027.2                      | 3025.7                     |

Standard errors in parentheses

\*  $p < 0.10$ , \*\*  $p < 0.05$ , \*\*\*  $p < 0.01$

## 6.5 Instrument Variable Approach

**Table A10. Robustness Check (6.5.1)**

|                      | Xtlogit                   |
|----------------------|---------------------------|
| Nurse_Responsibility | -70.73**<br>(33.83)       |
| H1_Residual          | 64.23*<br>(33.71)         |
| Overtime_Shifts      | 52.54***<br>(9.649)       |
| H2_Residual          | -52.00***<br>(9.667)      |
| Emotional_Fatigue    | 0.722***<br>(0.181)       |
| Cumulative_Workload  | -0.00380***<br>(0.000622) |

|                                                                                                        |                              |
|--------------------------------------------------------------------------------------------------------|------------------------------|
| H4_Residual                                                                                            | 0.000361<br>(0.000303)       |
| Cumulative_Workload_Square                                                                             | 0.000000105***<br>(2.92e-08) |
| H4_Residual_Square                                                                                     | 2.68e-08<br>(2.34e-08)       |
| Fix Effect RN: Nurse ID                                                                                | Yes                          |
| Fix Effect Time: Year, Month                                                                           | Yes                          |
| Fix Effect Shift: Patient Nurse<br>Ratio, Bed Occupancy Rate, RN<br>Unit Experience, Shift<br>Workload | Yes                          |
| Number of Observations                                                                                 | 17606                        |
| chi2                                                                                                   | 3037.2                       |

Standard errors in parentheses  
\*  $p < 0.10$ , \*\*  $p < 0.05$ , \*\*\*  $p < 0.01$

## 7. Re-ran main analysis with refined dataset

The following re-run the main results using the smaller subset of the dataset as discussed in Section 7.

**Table A11: Summary statistics**

|                           | N    | Mean     | SD       |
|---------------------------|------|----------|----------|
| <b>Main Variables</b>     |      |          |          |
| Quit                      | 9438 | 0.058    | 0.233    |
| Nurse Responsibility      | 9438 | 0.049    | 0.031    |
| Overtime Shifts           | 9438 | 0.346    | 0.628    |
| Emotional Fatigue         | 9438 | 0.087    | 0.287    |
| Cumulative Workload       | 9438 | 4359.153 | 2154.677 |
| <b>Control Variables</b>  |      |          |          |
| Patient Nurse Ratio       | 9438 | 0.657    | 0.069    |
| Bed Occupancy Rate        | 9438 | 0.731    | 0.108    |
| Unit Experience           | 9438 | 163.649  | 117.807  |
| Shift Workload            | 9438 | 631.767  | 286.830  |
| <b>Mediating Variable</b> |      |          |          |
| Help Available            | 9438 | 0.723    | 0.448    |

**Table A12. Main Result**

|                      | (1) Base | (2)                   | (3)                   | (4)                   | (5)                        |
|----------------------|----------|-----------------------|-----------------------|-----------------------|----------------------------|
| Nurse_Responsibility |          | -11.200***<br>(3.347) | -10.670***<br>(3.351) | -10.630***<br>(3.350) | -10.500***<br>(3.345)      |
| Overtime_Shifts      |          |                       | 0.459***<br>(0.098)   | 0.453***<br>(0.099)   | 0.489***<br>(0.099)        |
| Emotional_Fatigue    |          |                       |                       | 0.409*<br>(0.217)     | 0.455**<br>(0.218)         |
| Cumulative_Workload  |          |                       |                       |                       | -0.000462***<br>(0.000124) |

|                                                                                               |        |        |        |        |                           |
|-----------------------------------------------------------------------------------------------|--------|--------|--------|--------|---------------------------|
| Cumulative_Workload_Square                                                                    |        |        |        |        | 4.25e-08***<br>(1.36e-08) |
| Fix Effect RN: Nurse ID                                                                       | Yes    | Yes    | Yes    | Yes    | Yes                       |
| Fix Effect Time: Year, Month                                                                  | Yes    | Yes    | Yes    | Yes    | Yes                       |
| Fix Effect Shift: Patient Nurse Ratio, Bed Occupancy Rate, RN Unit Experience, Shift Workload | Yes    | Yes    | Yes    | Yes    | Yes                       |
| Number of Observations                                                                        | 9438   | 9438   | 9438   | 9438   | 9438                      |
| chi2                                                                                          | 1591.3 | 1603.4 | 1624.5 | 1628.1 | 1642.5                    |

Standard errors in parentheses

\*  $p < 0.10$ , \*\*  $p < 0.05$ , \*\*\*  $p < 0.01$
